# Supplementary material for: MoS2/Ni3S2 nanorod arrays well-aligned on Ni foam: a 3D hierarchical efficient bifunctional catalytic electrode for overall water splitting
Source: Royal Society of Chemistry journal article supplement (doi:10.1039/c7ra07667c), 2017-01-01
Supplement: c7ra07667c1.pdf [file c7ra07667c1.pdf]

# MoS<sub>2</sub>/Ni<sub>3</sub>S<sub>2</sub> Nanorod Arrays Well-aligned on Ni Foam: A 3D Hierarchical Efficient Bifunctional Catalytic Electrode for Overall Water Splitting

*Nan Zhang<sup>a\*</sup>, Junyu Lei<sup>b</sup>, Jianpeng Xie<sup>a</sup>, Haiyan Huang<sup>a</sup>, Ying Yu<sup>a\*</sup>*

<sup>a</sup> State Key Laboratory of Heavy Oil Processing, China University of Petroleum,  
Beijing, Beijing, P. R. China, 102249, TEL: +86-010-89739132

<sup>b</sup> Petrochemical Research Institute, PetroChina, Beijing, P. R. China, 100195

Corresponding authors: E-Mail: zhangnan@cup.edu.cn; yybjpudhx@foxmail.com

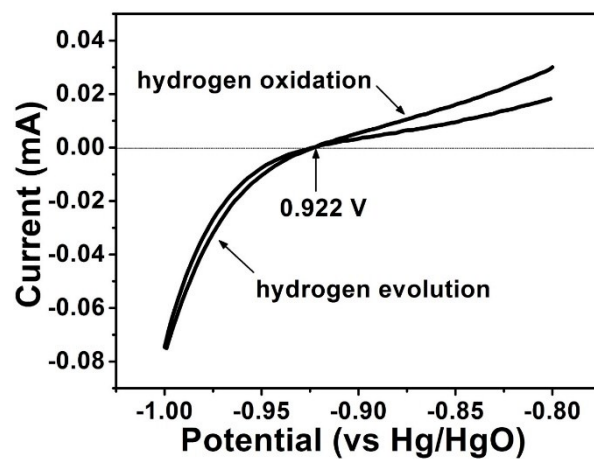

**Figure S1.** Cyclic voltammogram for the potential calibration procedure of the reference electrode -- Hg/HgO in 1.0 M KOH solution.

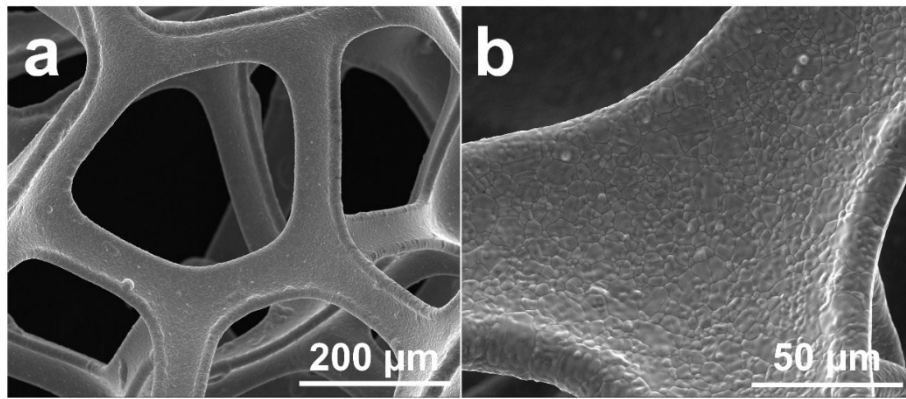

**Figure S2.** The SEM images of bare Ni foam (NF) at different magnifications.

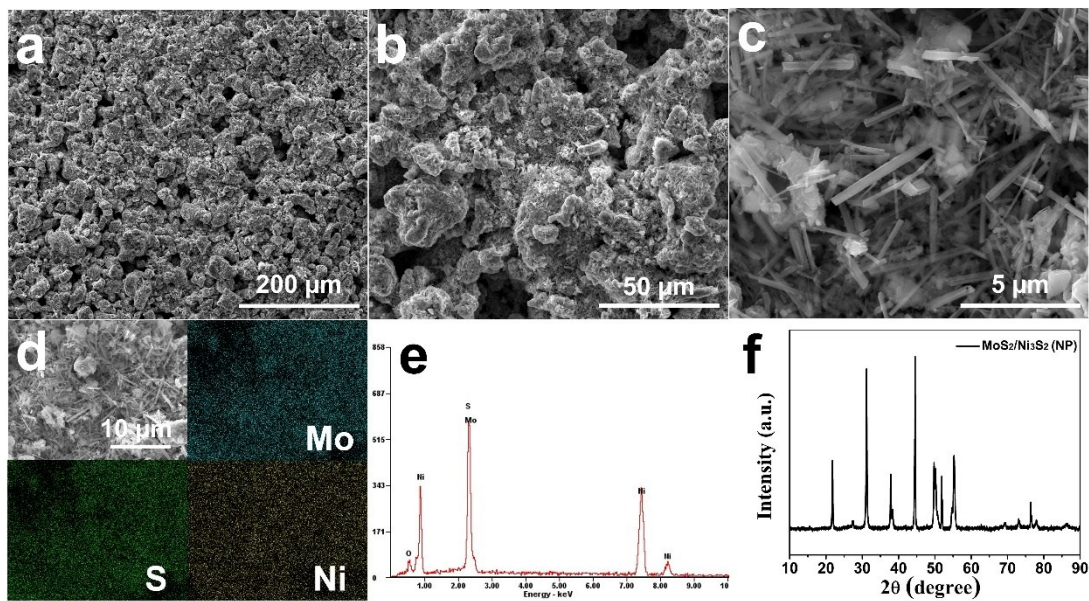

**Figure S3.** (a, b, c) The SEM images, (d) SEM and the corresponding elemental mapping images, (e) the EDX spectrum, and (f) the XRD pattern of MoS<sub>2</sub>/Ni<sub>3</sub>S<sub>2</sub> (NP).

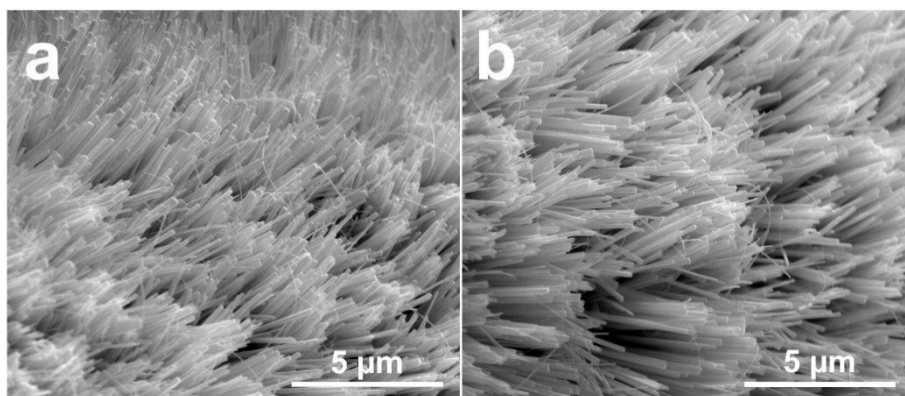

**Figure S4.** The SEM images of MoS<sub>2</sub>/Ni<sub>3</sub>S<sub>2</sub>/NF (a) before and (b) after the ultrasonication treatment for 30 min.

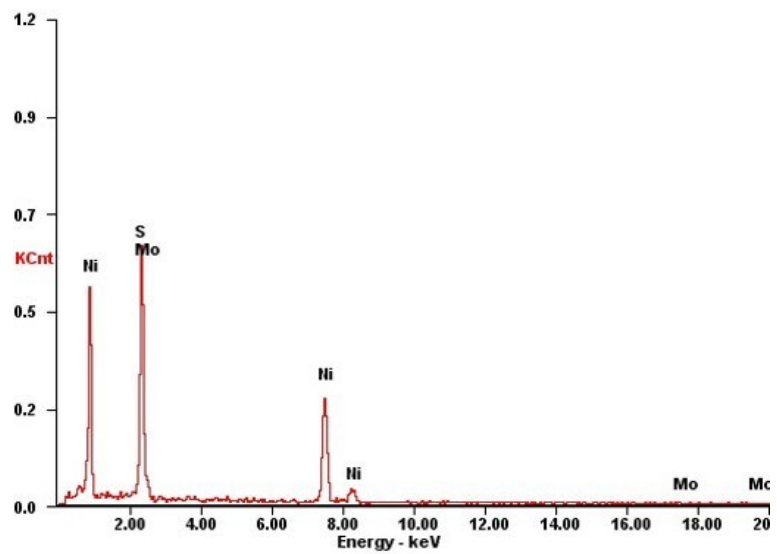

**Figure S5.** The EDX spectrum of MoS<sub>2</sub>/Ni<sub>3</sub>S<sub>2</sub> nanorods.

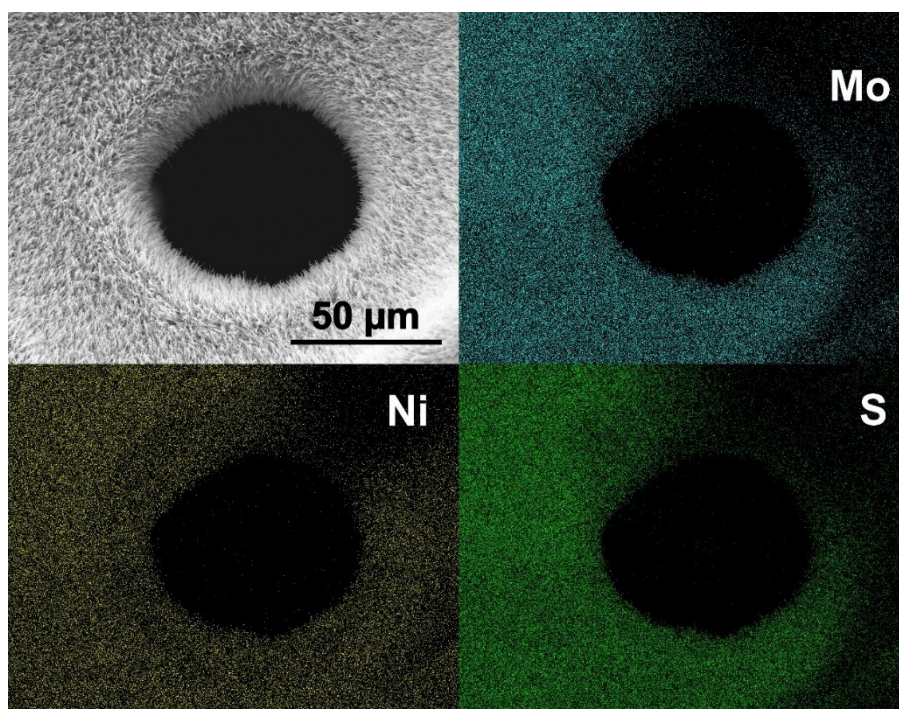

**Figure S6.** The SEM and the corresponding elemental mapping images of MoS<sub>2</sub>/Ni<sub>3</sub>S<sub>2</sub>/NF 3D electrode.

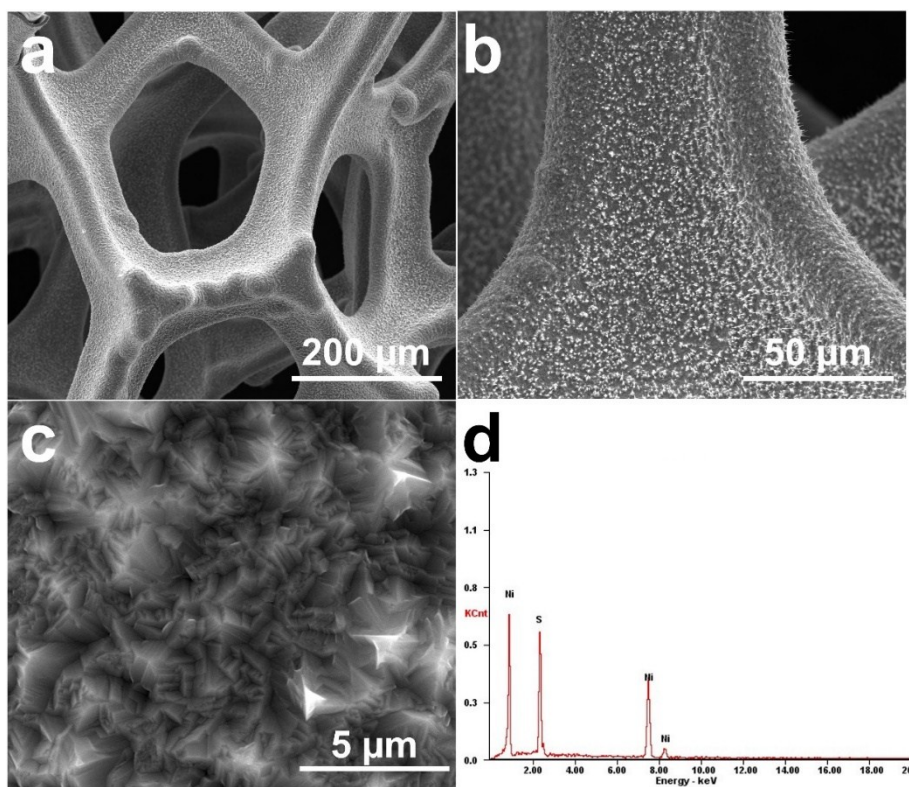

**Figure S7.** (a, b, c) The SEM images of  $\text{Ni}_3\text{S}_2/\text{NF}$ , (d) the EDX spectrum of  $\text{Ni}_3\text{S}_2/\text{NF}$ .



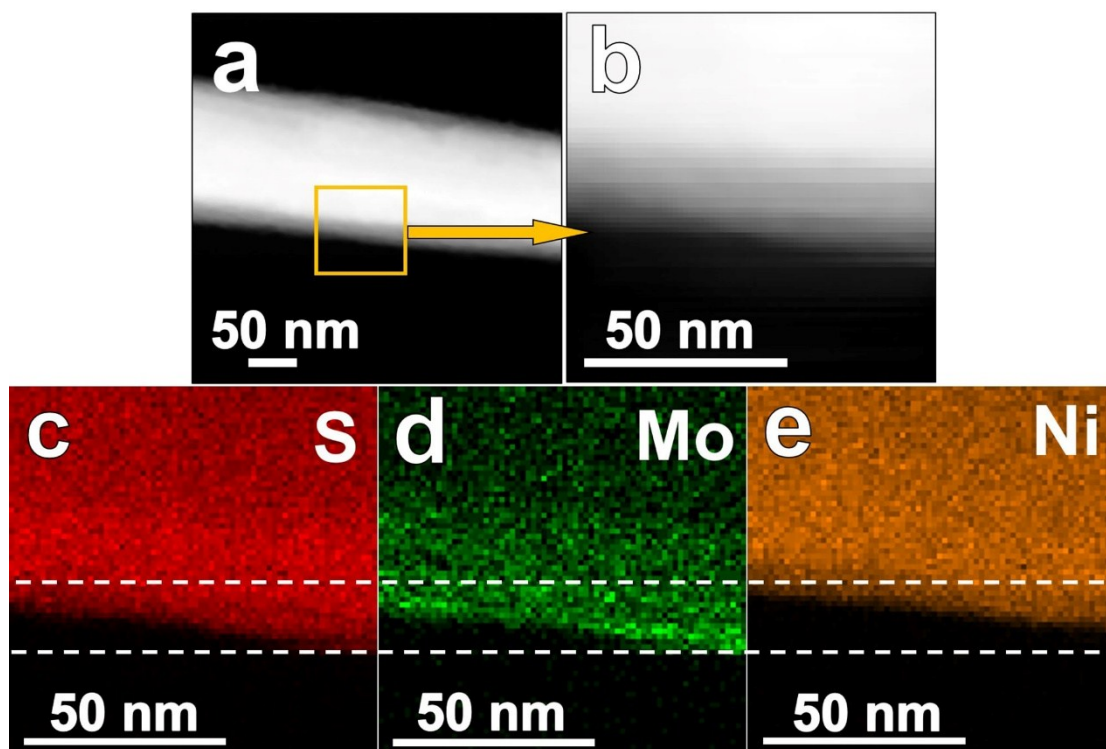

**Figure S8.** The elemental mapping images of the edge of a MoS<sub>2</sub>/Ni<sub>3</sub>S<sub>2</sub> nanorod.

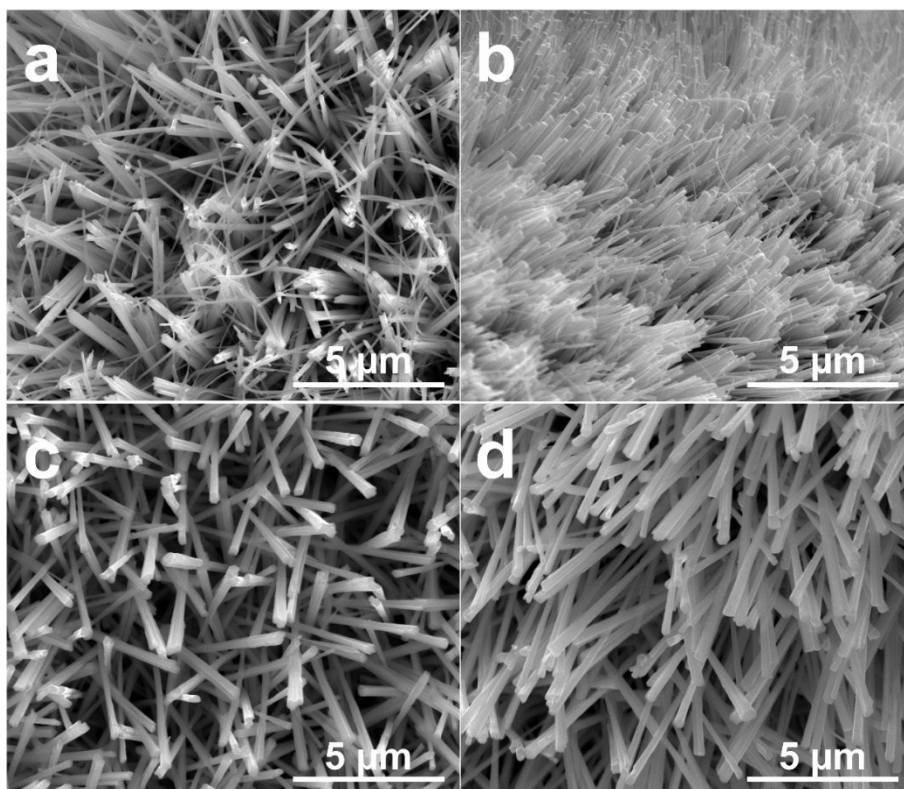

**Figure S9.** SEM images of (a)  $\text{MoS}_2/\text{Ni}_3\text{S}_2/\text{NF}$  (Mo:S=0.5:10), (b)  $\text{MoS}_2/\text{Ni}_3\text{S}_2/\text{NF}$  (Mo:S=1:10), (c)  $\text{MoS}_2/\text{Ni}_3\text{S}_2/\text{NF}$  (Mo:S=2:10) and (d)  $\text{MoS}_2/\text{Ni}_3\text{S}_2/\text{NF}$  (Mo:S=3:10).

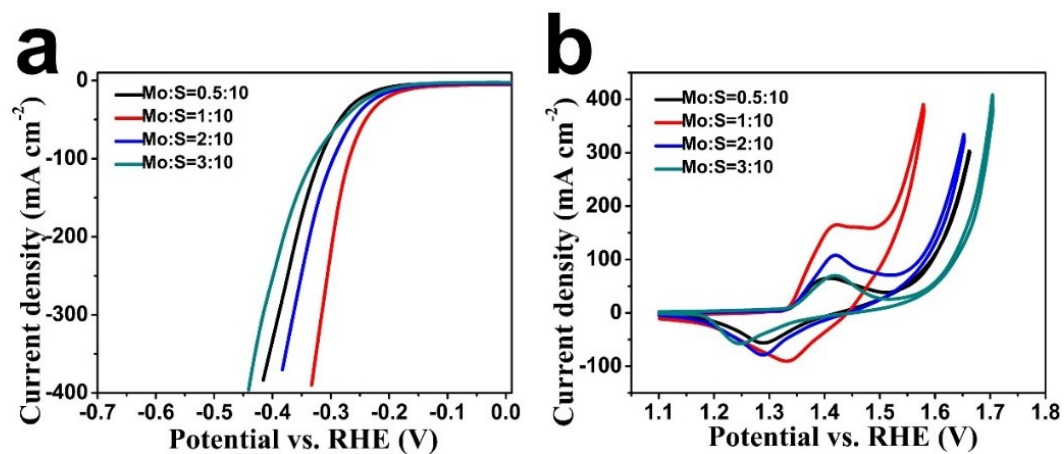

**Figure S10.** (a) HER and (b) OER polarization curves of MoS<sub>2</sub>/Ni<sub>3</sub>S<sub>2</sub>/NF (Mo:S=0.5:10), MoS<sub>2</sub>/Ni<sub>3</sub>S<sub>2</sub>/NF (Mo:S=1:10), MoS<sub>2</sub>/Ni<sub>3</sub>S<sub>2</sub>/NF (Mo:S=2:10) and MoS<sub>2</sub>/Ni<sub>3</sub>S<sub>2</sub>/NF (Mo:S=3:10).

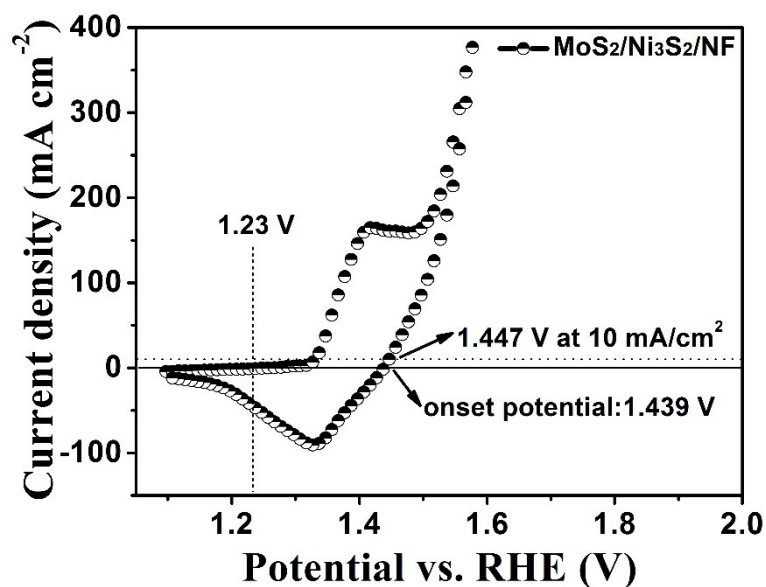

**Figure S11.** The cyclic voltammogram of the MoS<sub>2</sub>/Ni<sub>3</sub>S<sub>2</sub>/NF which consists of a forward scan and a backward scan. While due to the strong oxidative peak in forward scan, it is difficult to confirm the applied potential when the corresponding current density is below 165 mA/cm<sup>2</sup>. Therefore, the backward scan was employed to assess the OER activities of the applied electrocatalysts. The onset potential lies at the zero current point when oxygen generation occurred. Overpotential is defined relatively to the thermodynamic potential for OER reaction of 1.23 V versus reversible hydrogen electrode (RHE). As a consequence, MoS<sub>2</sub>/Ni<sub>3</sub>S<sub>2</sub>/NF's onset potential is approximately 1.439 V, and its onset overpotential is approximately 209 mV.

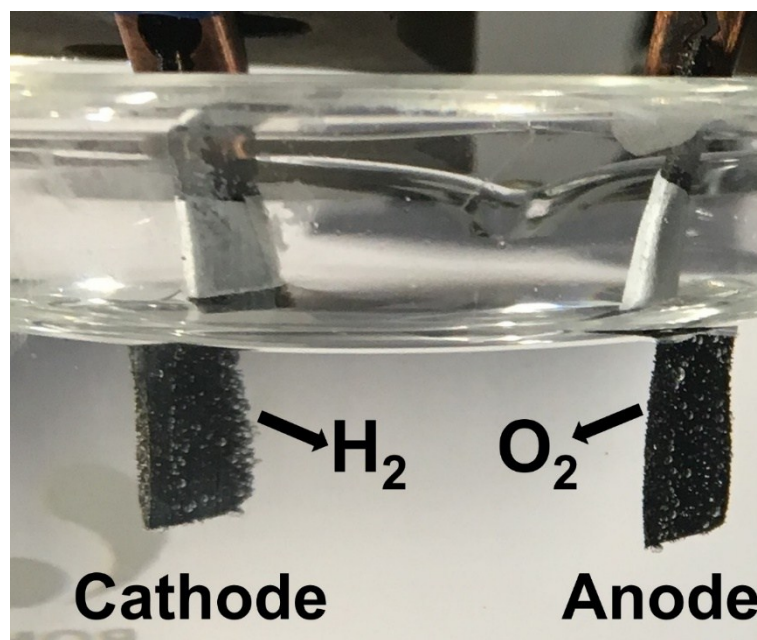

**Figure S12.** A representative photograph of the system depicting  $H_2$  (left) and  $O_2$  (right) generation during overall water electrolysis.

**Table S1.** The composition of MoS<sub>2</sub>/Ni<sub>3</sub>S<sub>2</sub> nanorods measured through EDX.

| Element | Wt%   | At%   |
|---------|-------|-------|
| Mo      | 8.05  | 4.05  |
| S       | 29.86 | 44.93 |
| Ni      | 62.09 | 51.02 |

**Table S2.** Comparison of HER, OER and overall water splitting performance of the recently reported non-noble-based bifunctional electrocatalysts.

| Catalyst                                                                 | Electrolyte                         | Scan rate<br>(mV/s) | HER                                                   |                                        | OER                                                   |                                        | Full water splitting                       | Ref.      |
|--------------------------------------------------------------------------|-------------------------------------|---------------------|-------------------------------------------------------|----------------------------------------|-------------------------------------------------------|----------------------------------------|--------------------------------------------|-----------|
|                                                                          |                                     |                     | Overpotential@onset,<br>10 mA cm <sup>-2</sup> , (mV) | Tafel slope<br>(mV dec <sup>-1</sup> ) | Overpotential@onset,<br>10 mA cm <sup>-2</sup> , (mV) | Tafel slope<br>(mV dec <sup>-1</sup> ) | Potential@<br>10 mA cm <sup>-2</sup> , (V) |           |
| NiMo-alloy                                                               | 1M KOH                              | 2                   | 60, 92                                                | 76                                     | 300, 310                                              | 47                                     | 1.64                                       | [1]       |
| Ni <sub>0.9</sub> Fe <sub>0.1</sub> /NC                                  | 1M KOH                              | 10                  | -, 219                                                | 111                                    | -, 330                                                | 45                                     | 1.58                                       | [2]       |
| CoOx/CN                                                                  | 1M KOH                              | 5                   | 85, 232                                               | 115                                    | -, 260                                                | -                                      | 1.55@20 mA cm <sup>-2</sup>                | [3]       |
| Co <sub>3</sub> O <sub>4</sub> @NCNTs/CP                                 | 0.1M KOH                            | 2                   | 260, 380                                              | 120                                    | 330, 470                                              | -                                      | -                                          | [4]       |
| Co <sub>3</sub> O <sub>4</sub> /CF                                       | 1M KOH                              | 5                   | 50, -                                                 | 116                                    | 290, -                                                | 101                                    | 1.91                                       | [5]       |
| NiCo <sub>2</sub> O <sub>4</sub>                                         | 1M NaOH                             | 3                   | 50, 110                                               | 49.7                                   | 230, 290                                              | 53                                     | 1.65                                       | [6]       |
| Ni <sub>2</sub> P/NiO <sub>x</sub>                                       | 1M KOH                              | 5                   | -, 220                                                | -                                      | -, 290                                                | 47                                     | 1.63                                       | [7]       |
| MoO <sub>2</sub>                                                         | 1M KOH                              | -                   | -, 27                                                 | 41                                     | 200, 260                                              | 54                                     | 1.53                                       | [8]       |
| NiFeO <sub>x</sub>                                                       | 1M KOH                              | 5                   | 40, 88                                                | -                                      | 200, 230                                              | 31.5                                   | 1.51                                       | [9]       |
| NiFe LDH/NF                                                              | 1M NaOH                             | 1                   | -, 210                                                | -                                      | -, 240                                                | -                                      | 1.7                                        | [10]      |
| Co-P/Cu                                                                  | 1M KOH                              | 2                   | 50, 94                                                | 42                                     | 300, 345                                              | 47                                     | 1.74@100 mA cm <sup>-2</sup>               | [11]      |
| CoP-MNA/NF                                                               | 1M KOH                              | 2                   | 0, 54                                                 | 51                                     | 270, 290                                              | -                                      | 1.62                                       | [12]      |
| Ni <sub>2</sub> P/Ni/NF                                                  | 1M KOH                              | 2                   | 40, 98                                                | 72                                     | 190, 200                                              | -                                      | 1.49                                       | [13]      |
| CoP/CNTs                                                                 | 0.1M NaOH                           | 5                   | 220, -                                                | 56                                     | 290, 330                                              | 50                                     | -                                          | [14]      |
| Ni <sub>5</sub> P <sub>4</sub> /NF                                       | 0.5M H <sub>2</sub> SO <sub>4</sub> | 10                  | -, 140                                                | 40                                     | 250, -                                                | -                                      | 1.70                                       | [15]      |
| CoP/rGO                                                                  | 0.5M H <sub>2</sub> SO <sub>4</sub> | 5                   | 13, 105                                               | 50                                     | -, 340                                                | 66                                     | 1.70                                       | [16]      |
| NiCoP NPs                                                                | 1M KOH                              | 5                   | 42, 97                                                | 50                                     | -, 310                                                | 52                                     | 1.64                                       | [17]      |
| CoP                                                                      | 1M KOH                              | 2                   | -, 154                                                | 51                                     | 270, 354                                              | 52                                     | 2.0@165 mA cm <sup>-2</sup>                | [18]      |
| Co-N <sub>x</sub>                                                        | 0.1M KOH                            | 0.5                 | -, 220                                                | 81                                     | -, 270@5 mA cm <sup>-2</sup>                          | 83.3                                   | -                                          | [19]      |
| TiN@Ni <sub>3</sub> N NW                                                 | 1M KOH                              | 5                   | 15, 21                                                | 42.1                                   | 290, 350                                              | 93.7                                   | 1.64                                       | [20]      |
| NiSe <sub>2</sub> /Ti                                                    | 1M KOH                              | 5                   | 20, 96                                                | 82                                     | 270, 300@20 mA cm <sup>-2</sup>                       | 82                                     | 1.66                                       | [21]      |
| Co <sub>0.13</sub> Ni <sub>0.87</sub> Se <sub>2</sub> /Ti                | 1M KOH                              | 5                   | -, 64                                                 | 63                                     | -, 350@100 mA cm <sup>-2</sup>                        | 94                                     | 1.62                                       | [22]      |
| Co <sub>9</sub> S <sub>8</sub> @MoS <sub>2</sub> /CNFs                   | 0.5M H <sub>2</sub> SO <sub>4</sub> | 2                   | 64, 190                                               | 110                                    | 350, 430<br>(test in 1M KOH)                          | 61                                     | -                                          | [23]      |
| Ni <sub>2</sub> S <sub>3</sub> /NF                                       | 1M KOH                              | 50                  | -, 223                                                | -                                      | -, 260                                                | -                                      | 1.76@13 mA cm <sup>-2</sup>                | [24]      |
| Ni-Co-S NS/CF                                                            | 1M KOH                              | 5                   | -, 140                                                | 96                                     | -, 363@100 mA cm <sup>-2</sup>                        | 109                                    | 1.67                                       | [25]      |
| Zn <sub>0.76</sub> Co <sub>0.24</sub> S/CoS <sub>2</sub>                 | 1M KOH                              | 5                   | 170, 238@20 mA cm <sup>-2</sup>                       | 164                                    | 316, 330@20 mA cm <sup>-2</sup>                       | 79                                     | 1.66                                       | [26]      |
| Ni <sub>2</sub> .3%-CoS <sub>2</sub> /CC                                 | 1M KOH                              | 2                   | 136,<br>231@100 mA cm <sup>-2</sup>                   | 106                                    | 300,<br>510@100 mA cm <sup>-2</sup>                   | 119                                    | 1.66                                       | [27]      |
| NiS/NF                                                                   | 1M KOH                              | 5                   | -, 158@20 mA cm <sup>-2</sup>                         | 83                                     | 320, 340@50 mA cm <sup>-2</sup>                       | 89                                     | 1.64                                       | [28]      |
| NiCo <sub>2</sub> S <sub>4</sub> NW/NF                                   | 1M KOH                              | 10                  | -, 210                                                | 58.9                                   | -, 260                                                | 40                                     | 1.63                                       | [29]      |
| 20 nm BSCF-NF                                                            | 0.1M KOH                            | 5                   | -, -                                                  | -                                      | -, 500                                                | 73                                     | 1.62 (Pt-NF as<br>cathode in 1M KOH)       | [30]      |
| SrNb <sub>0.1</sub> Co <sub>0.7</sub> Fe <sub>0.2</sub> O <sub>3-δ</sub> | 0.1M KOH                            | 5                   | 150, 262                                              | 134                                    | 290, 389                                              | 61                                     | 1.68                                       | [31]      |
| perovskite nanorods                                                      | 1M KOH                              |                     | 232                                                   | 103                                    | 370                                                   | 48                                     |                                            |           |
| MoS <sub>2</sub> /Ni <sub>2</sub> S <sub>3</sub> /NF                     | 1M KOH                              | 5                   | 50, 187                                               | 90                                     | 209, 217                                              | 38                                     | 1.47                                       | This work |

---

274@100 mA cm<sup>-2</sup>,

300@200 mA cm<sup>-2</sup>,

320@300 mA cm<sup>-2</sup>

275@100 mA cm<sup>-2</sup>,

313@200 mA cm<sup>-2</sup>,

335@300 mA cm<sup>-2</sup>

1.59@100 mA cm<sup>-2</sup>

1.64@200 mA cm<sup>-2</sup>

1.66@300 mA cm<sup>-2</sup>

---



## REFERENCES

1. J. Tian, N. Cheng, Q. Liu, X. Sun, Y. He and A. M. Asiri, *J. Mater. Chem. A*, 2015, **3**, 20056-20059.
2. X. Zhang, H. Xu, X. Li, Y. Li, T. Yang and Y. Liang, *Acs Catal.*, 2016, **6**, 580-588.
3. H. Jin, J. Wang, D. Su, Z. Wei, Z. Pang and Y. Wang, *J. Am. Chem. Soc.*, 2015, **137**, 2688-2694.
4. T. Sharifi, E. Gracia-Espino, X. Jia, R. Sandstrom and T. Wagberg, *Acs Appl. Mater. Inter.*, 2015, **7**, 28148-28155.
5. S. Du, Z. Ren, J. Zhang, J. Wu, W. Xi, J. Zhu and H. Fu, *Chem. Commun.*, 2015, **51**, 8066-8069.
6. X. Gao, H. Zhang, Q. Li, X. Yu, Z. Hong, X. Zhang, C. Liang and Z. Lin, *Angew. Chem. Int. Ed.*, 2016, **55**, 6290-6294.
7. L.-A. Stern, L. Feng, F. Song and X. Hu, *Energy Environ. Sci.*, 2015, **8**, 2347-2351.
8. Y. Jin, H. Wang, J. Li, X. Yue, Y. Han, P. K. Shen and Y. Cui, *Adv. Mater.*, 2016, **28**, 3785-3790.
9. H. Wang, H.-W. Lee, Y. Deng, Z. Lu, P.-C. Hsu, Y. Liu, D. Lin and Y. Cui, *Nature Communications*, 2015, **6**.
10. J. Luo, J.-H. Im, M. T. Mayer, M. Schreier, M. K. Nazeeruddin, N.-G. Park, S. D. Tilley, H. J. Fan and M. Graetzel, *Science*, 2014, **345**, 1593-1596.
11. N. Jiang, B. You, M. Sheng and Y. Sun, *Angew. Chem. Int. Ed.*, 2015, **54**, 6251-6254.
12. Y.-P. Zhu, Y.-P. Liu, T.-Z. Ren and Z.-Y. Yuan, *Adv. Funct. Mater.*, 2015, **25**, 7337-7347.
13. B. You, N. Jiang, M. Sheng, M. W. Bhushan and Y. Sun, *Acs Catal.*, 2016, **6**, 714-721.
14. C.-C. Hou, S. Cao, W.-F. Fu and Y. Chen, *Acs Applied Materials & Interfaces*, 2015, **7**, 28412-28419.
15. M. Ledendecker, S. K. Calderon, C. Papp, H.-P. Steinrueck, M. Antonietti and M.

- Shalom, *Angew. Chem. Int. Ed.*, 2015, **54**, 12361-12365.
16. L. Jiao, Y.-X. Zhou and H.-L. Jiang, *Chemical Science*, 2016, **7**, 1690-1695.
  17. C. Wang, J. Jiang, T. Ding, G. Chen, W. Xu and Q. Yang, *Advanced Materials Interfaces*, 2016, **3**.
  18. B. You, N. Jiang, M. Sheng, S. Gul, J. Yano and Y. Sun, *Chem. Mater.*, 2015, **27**, 7636-7642.
  19. B. Bayatsarmadi, Y. Zheng, Y. Tang, M. Jaroniec and S.-Z. Qiao, *Small*, 2016, **12**, 3703-3711.
  20. Q. Zhang, Y. Wang, Y. Wang, A. M. Al-Enizi, A. A. Elzatahry and G. Zheng, *J. Mater. Chem. A*, 2016, **4**, 5713-5718.
  21. Z. Pu, Y. Luo, A. M. Asiri and X. Sun, *Acs Appl. Mater. Inter.*, 2016, **8**, 4718-4723.
  22. T. Liu, A. M. Asiri and X. Sun, *Nanoscale*, 2016, **8**, 3911-3915.
  23. H. Zhu, J. Zhang, R. Yanzhang, M. Du, Q. Wang, G. Gao, J. Wu, G. Wu, M. Zhang, B. Liu, J. Yao and X. Zhang, *Adv. Mater.*, 2015, **27**, 4752-4759.
  24. L.-L. Feng, G. Yu, Y. Wu, G.-D. Li, H. Li, Y. Sun, T. Asefa, W. Chen and X. Zou, *J. Am. Chem. Soc.*, 2015, **137**, 14023-14026.
  25. T. Liu, X. Sun, A. M. Asiri and Y. He, *Int. J. Hydrogen Energy*, 2016, **41**, 7264-7269.
  26. Y. Liang, Q. Liu, Y. Luo, X. Sun, Y. He and A. M. Asiri, *Electrochim. Acta*, 2016, **190**, 360-364.
  27. W. Fang, D. Liu, Q. Lu, X. Sun and A. M. Asiri, *Electrochem. Commun.*, 2016, **63**, 60-64.
  28. W. Zhu, X. Yue, W. Zhang, S. Yu, Y. Zhang, J. Wang and J. Wang, *Chemical Communications*, 2016, **52**, 1486-1489.
  29. A. Sivanantham, P. Ganesan and S. Shanmugam, *Adv. Funct. Mater.*, 2016, **26**, 4661-4672.
  30. G. Chen, W. Zhou, D. Guan, J. Sunarso, Y. Zhu, X. Hu, W. Zhang and Z. Shao, *Sci. Adv.*, 2017, **3**, e1603206.
  31. Y. Zhu, W. Zhou, Y. Zhong, Y. Bu, X. Chen, Q. Zhong, M. Liu and Z. Shao, *Adv.*

*Energy Mater.*, 2017, **7**, 1602122.
